# Supplementary material for: Nucleolin Targeting by N6L Inhibits Wnt/β-Catenin Pathway Activation in Pancreatic Ductal Adenocarcinoma
Source: MDPI journal article supplement (doi:10.3390/cancers13122986), 2021-06-15

Figure 1C mPDAC - pull-down – anti-β-catenin (duplicate)

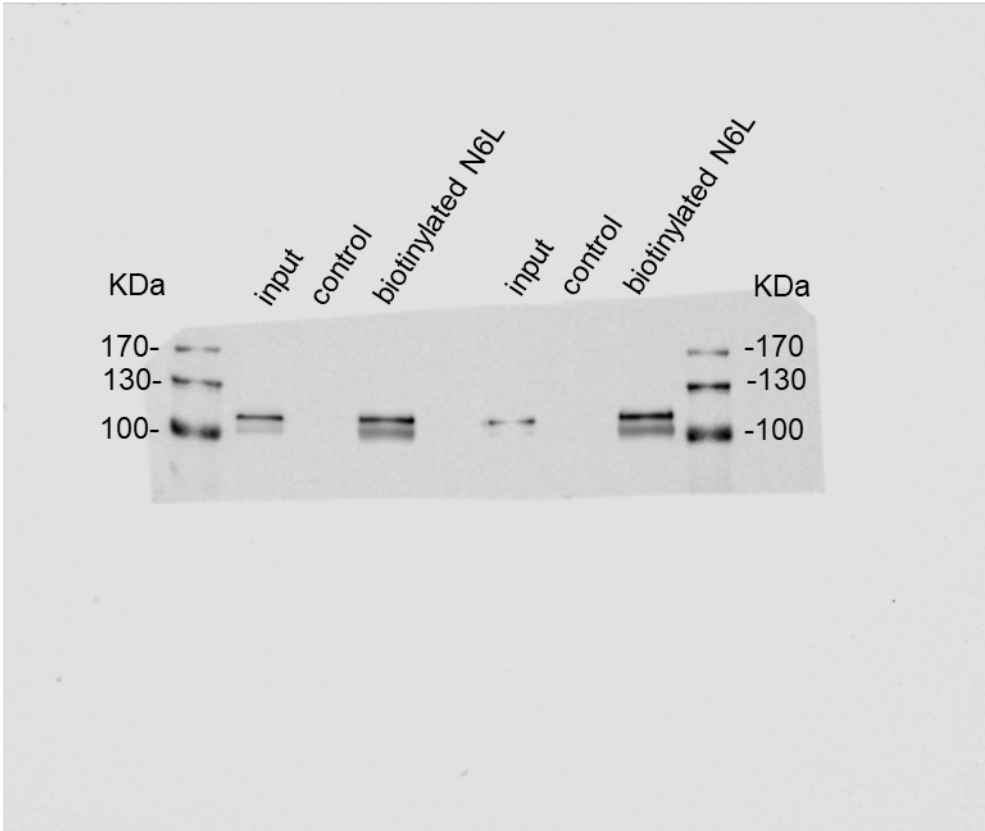

Figure 1B mPDAC – pull-down – anti-nucleolin (duplicate)

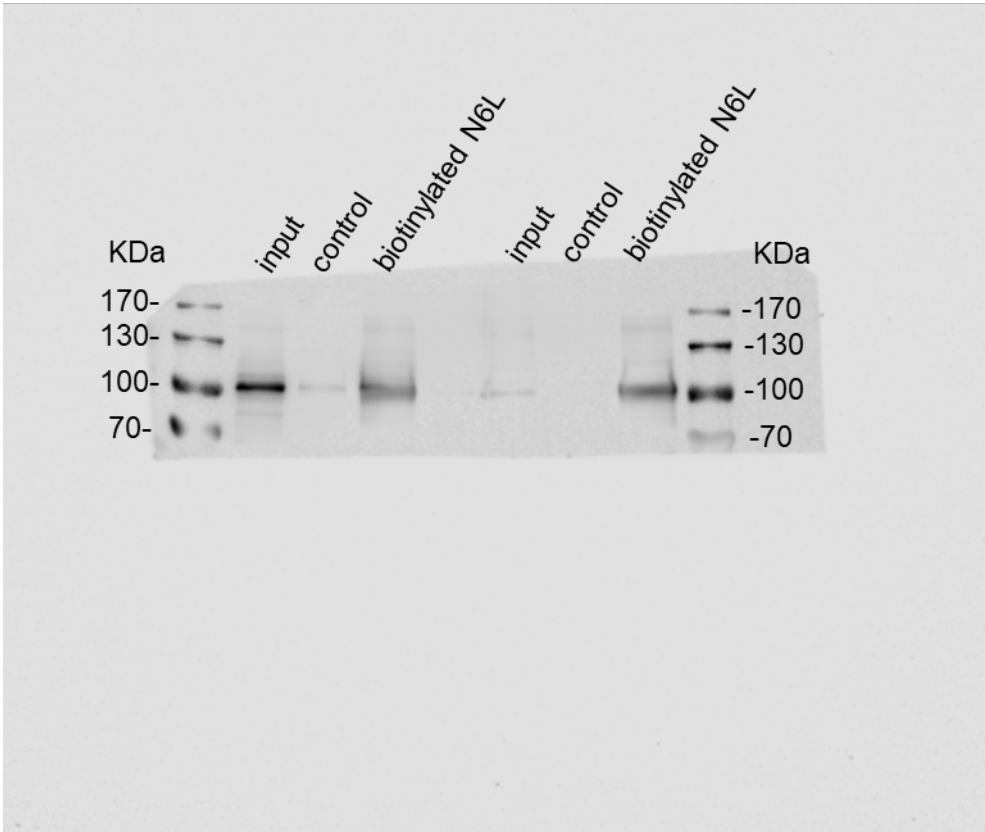

Figure 1C MIA PaCa-2 – pull-down – anti-β-catenin (duplicate)

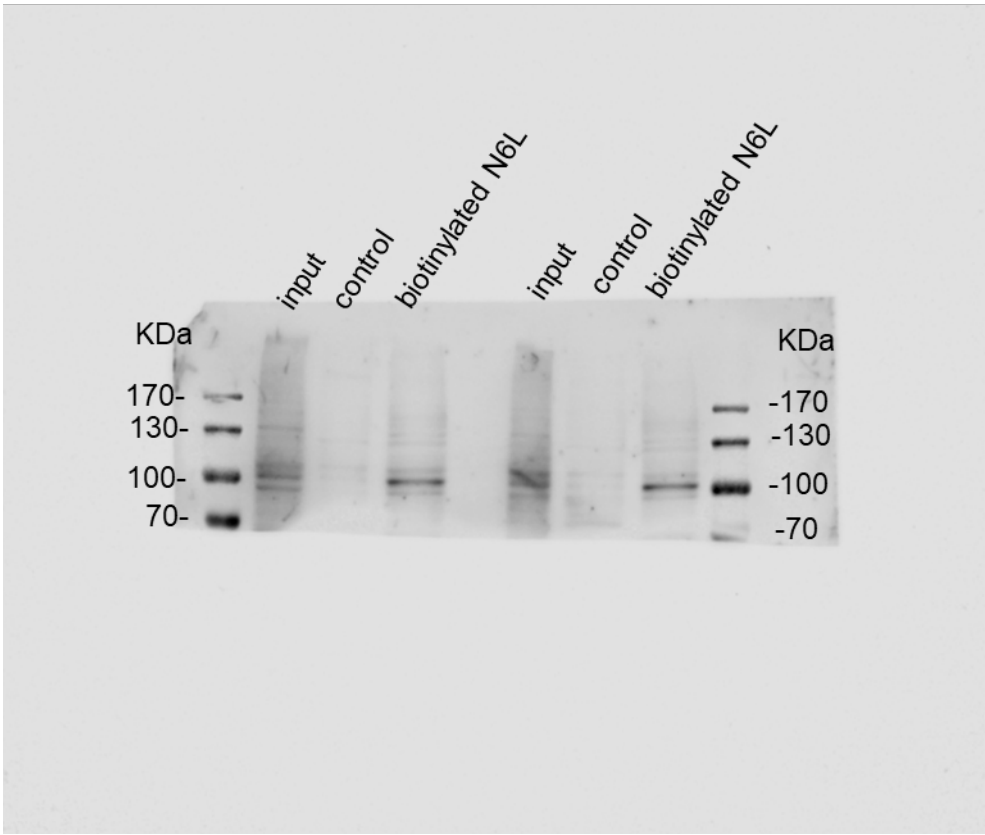

Figure 1C MIA PaCa-2 – pull-down – anti-nucleolin (duplicate)

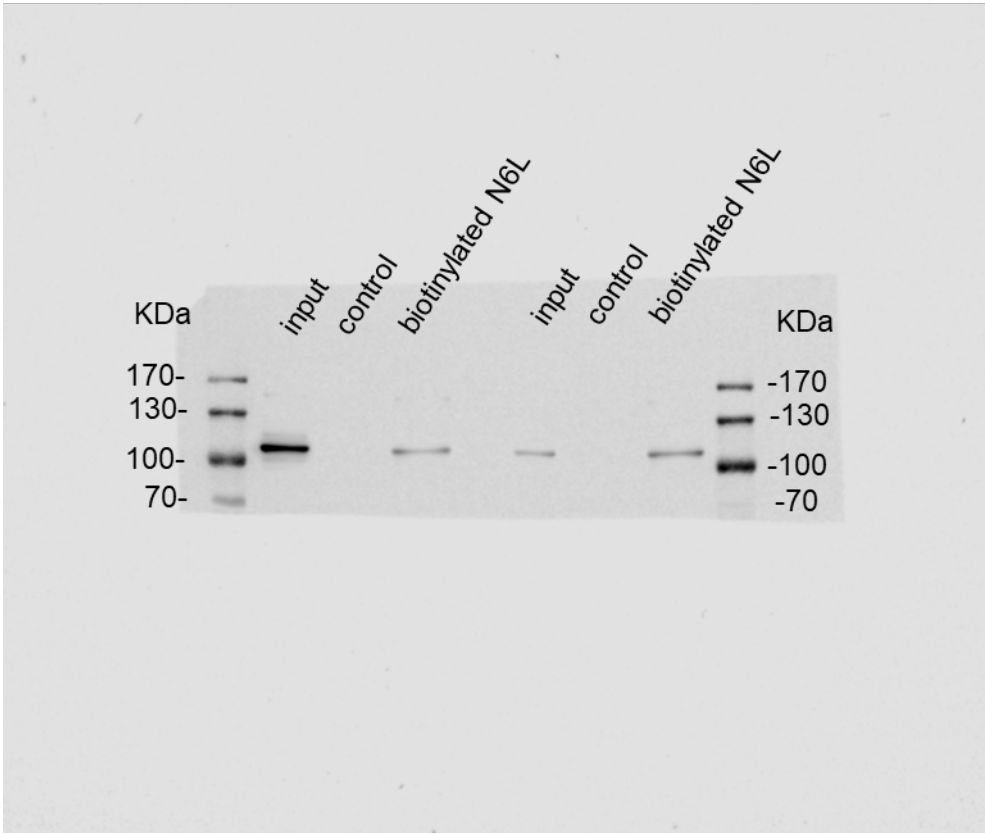

Figure 2D MIA PaCa-2 – N6L+Wnt3A – anti-cyclin D1

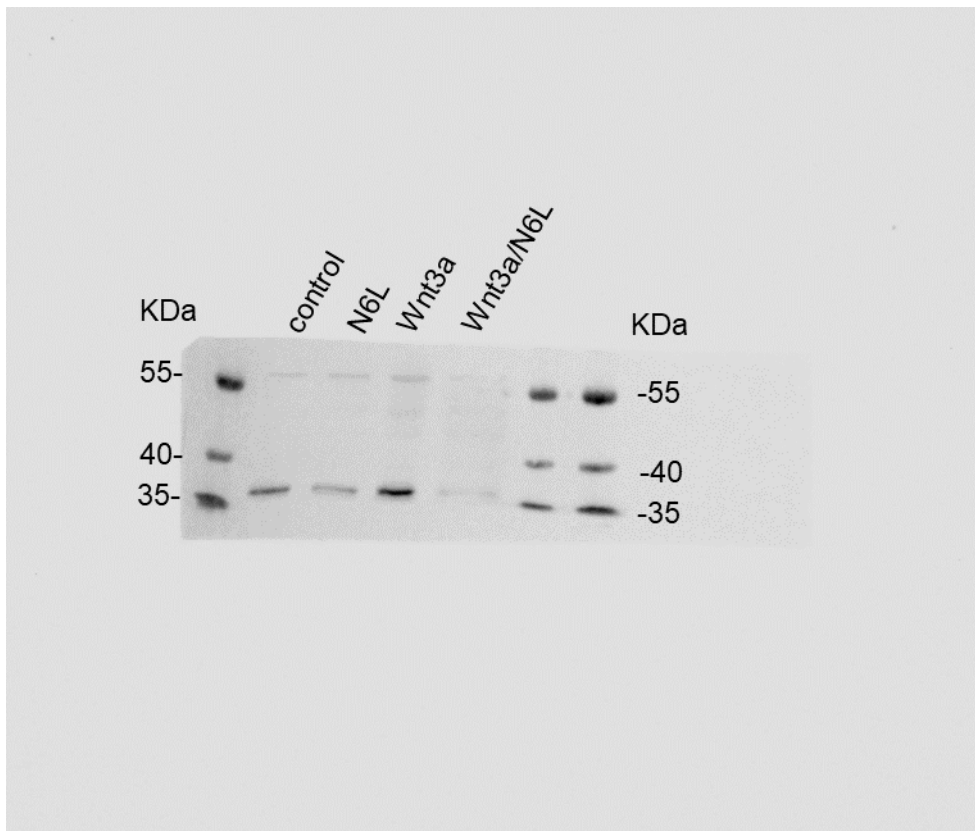

Figure 2D MIA PaCa-2 – N6L+Wnt3A – anti- $\beta$ -actin

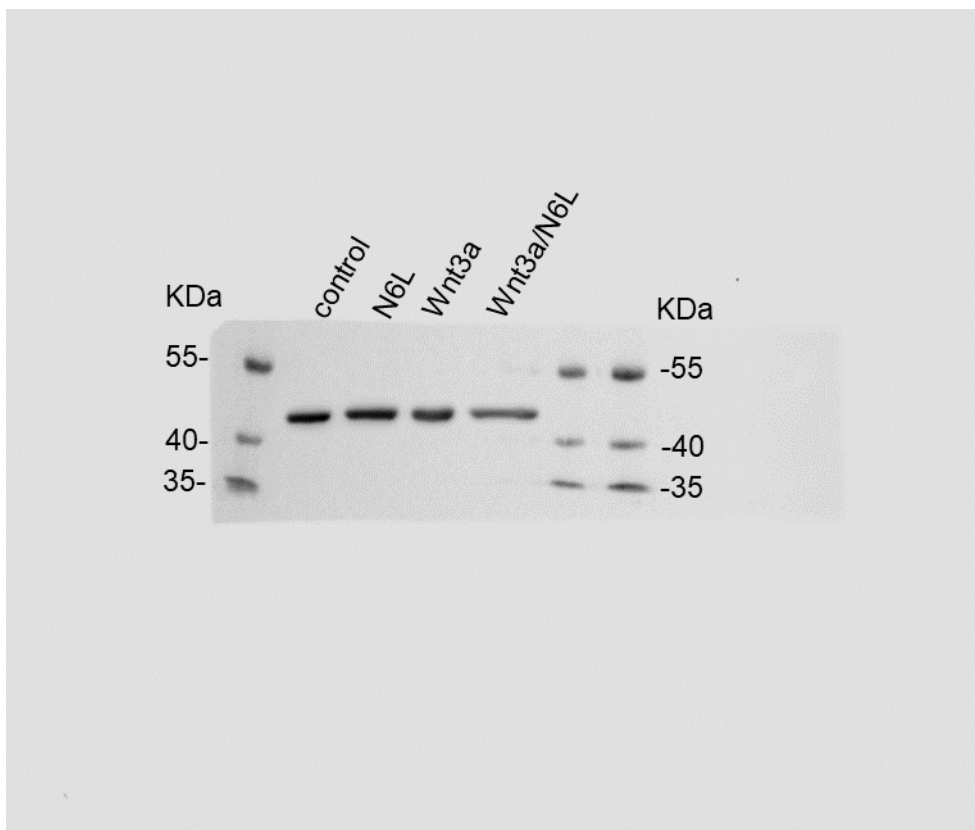

Figure 2F MIA PaCa-2 – N6L+Wnt3A – anti-β-catenin

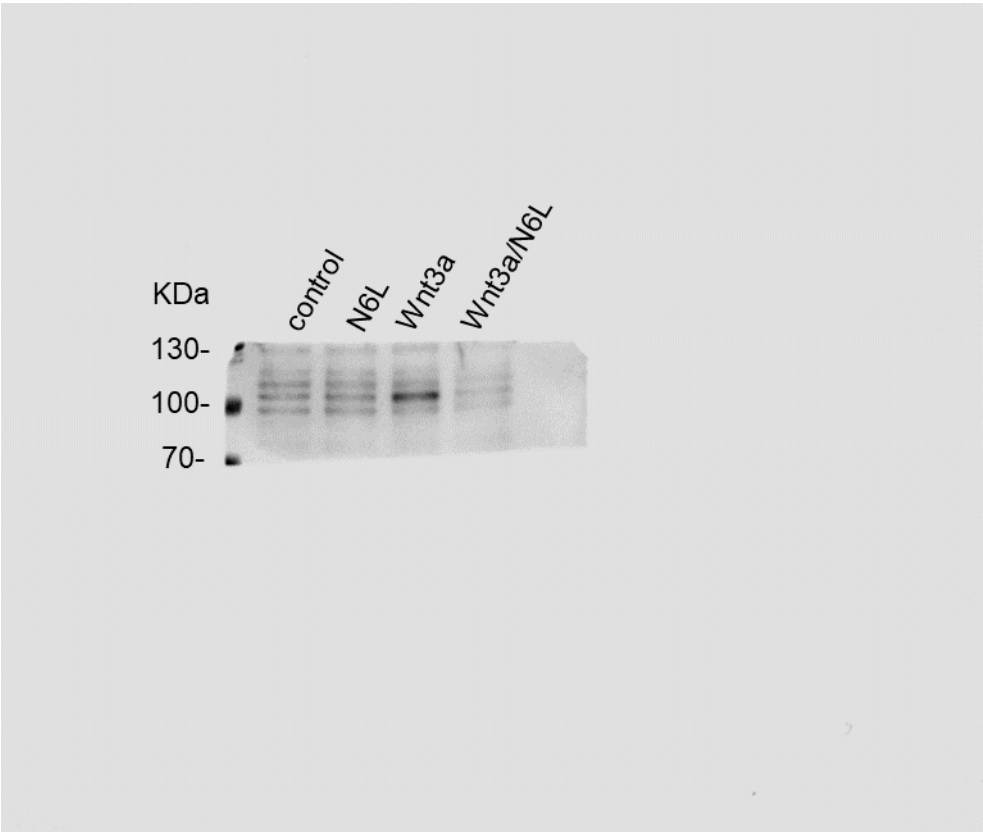

Figure 2F MIA PaCa-2 – N6L+Wnt3A – anti-active β-catenin

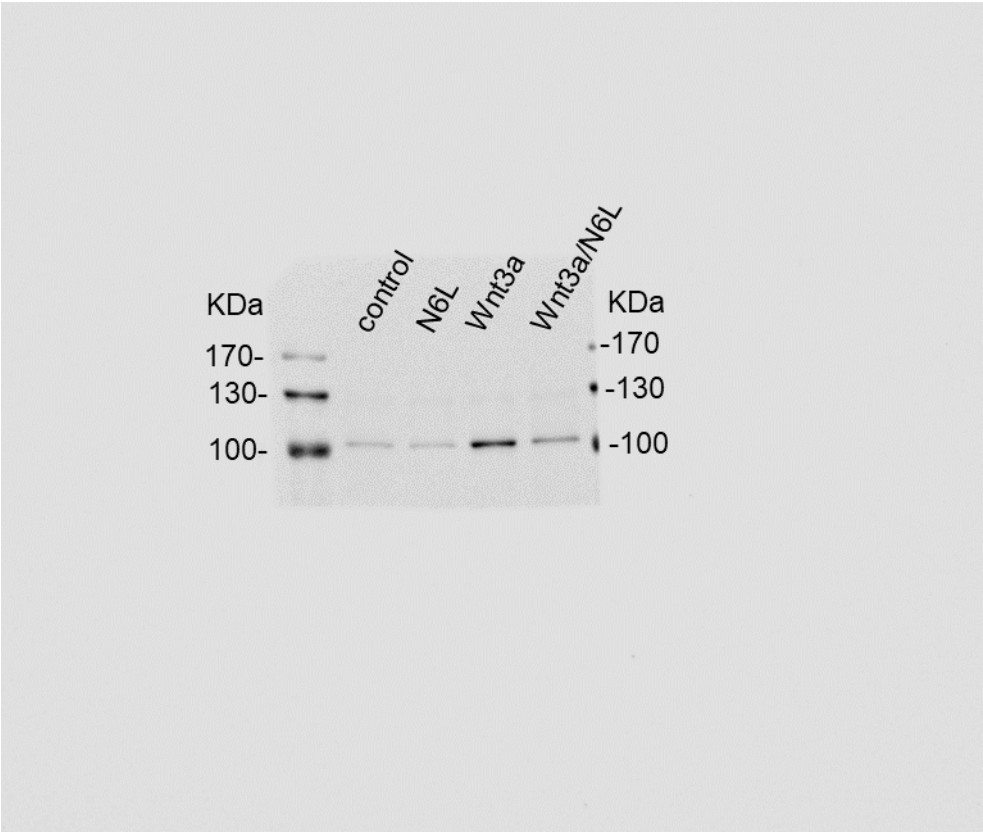

Figure 2F MIA PaCa-2 – N6L+Wnt3A – anti- $\beta$ -actin

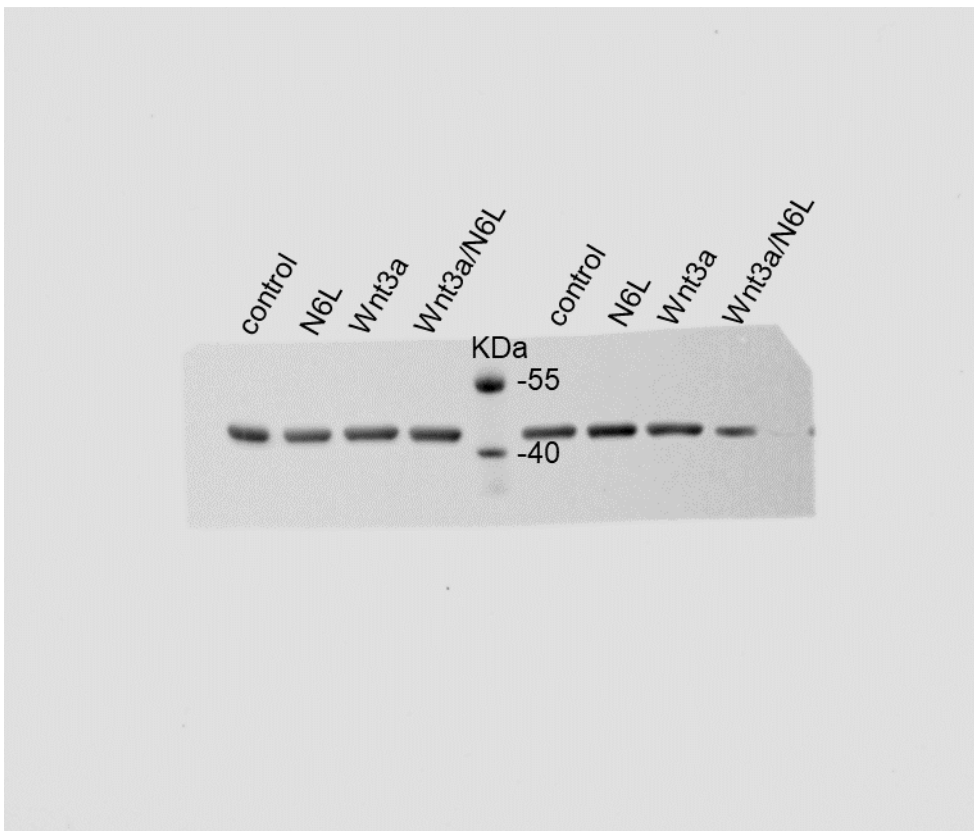

Figure 2I MIA PaCa-2 – N6L+TWS119 – anti-active  $\beta$ -catenin

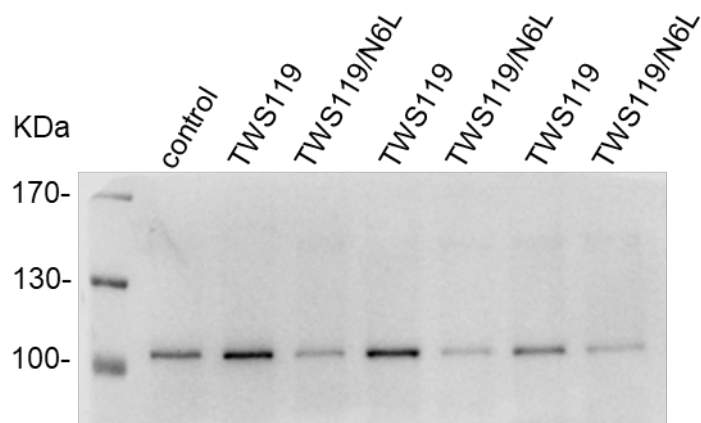

Figure 2I MIA PaCa-2 – N6L+TWS119 – anti-β-actin

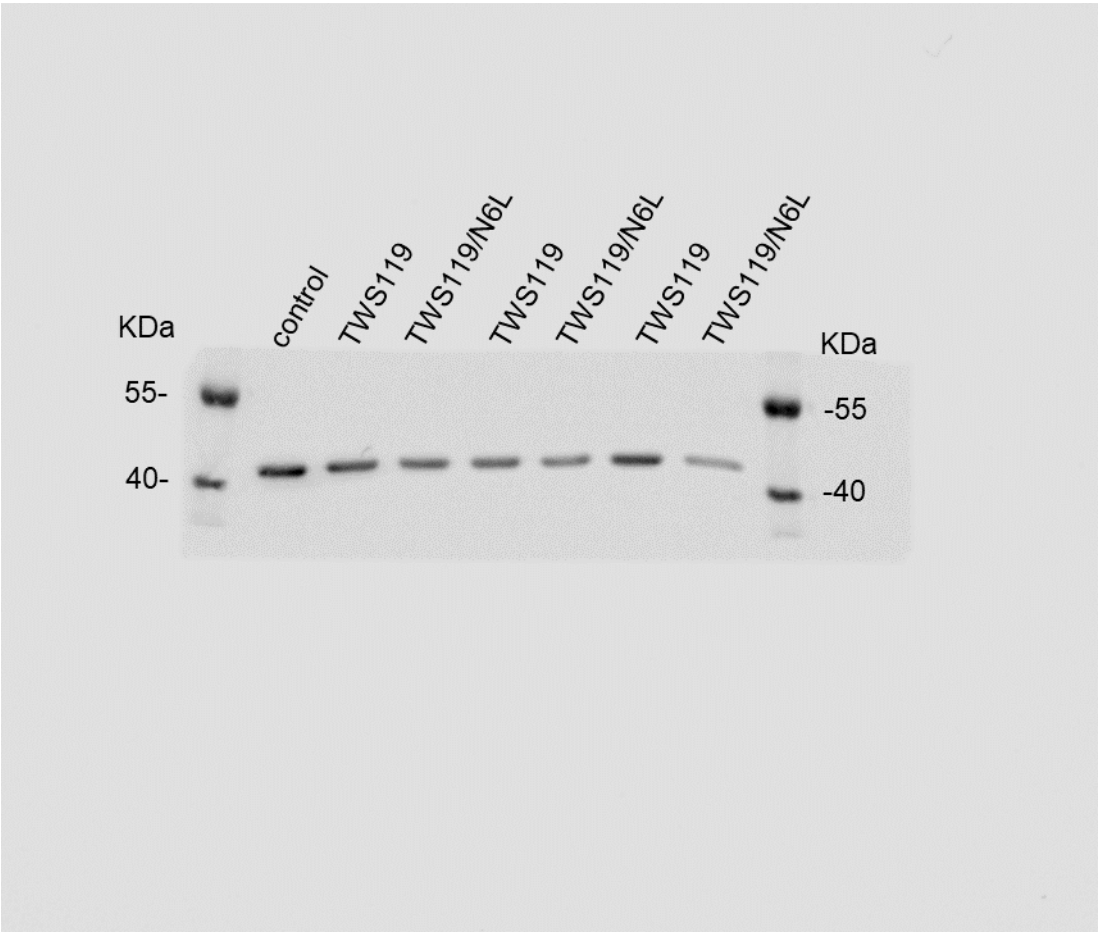

Figure 3A MIA PaCa-2 – Nucleolin IP – anti- $\beta$ -catenin

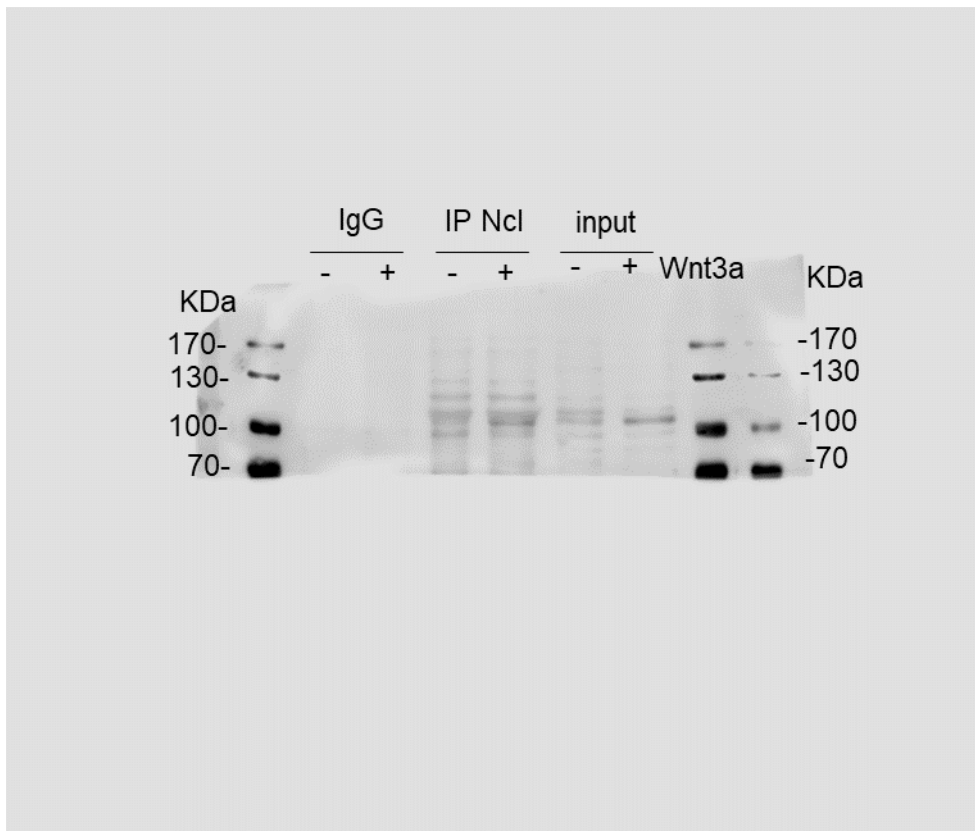

Figure 3A MIA PaCa-2 – Nucleolin IP – anti-nucleolin

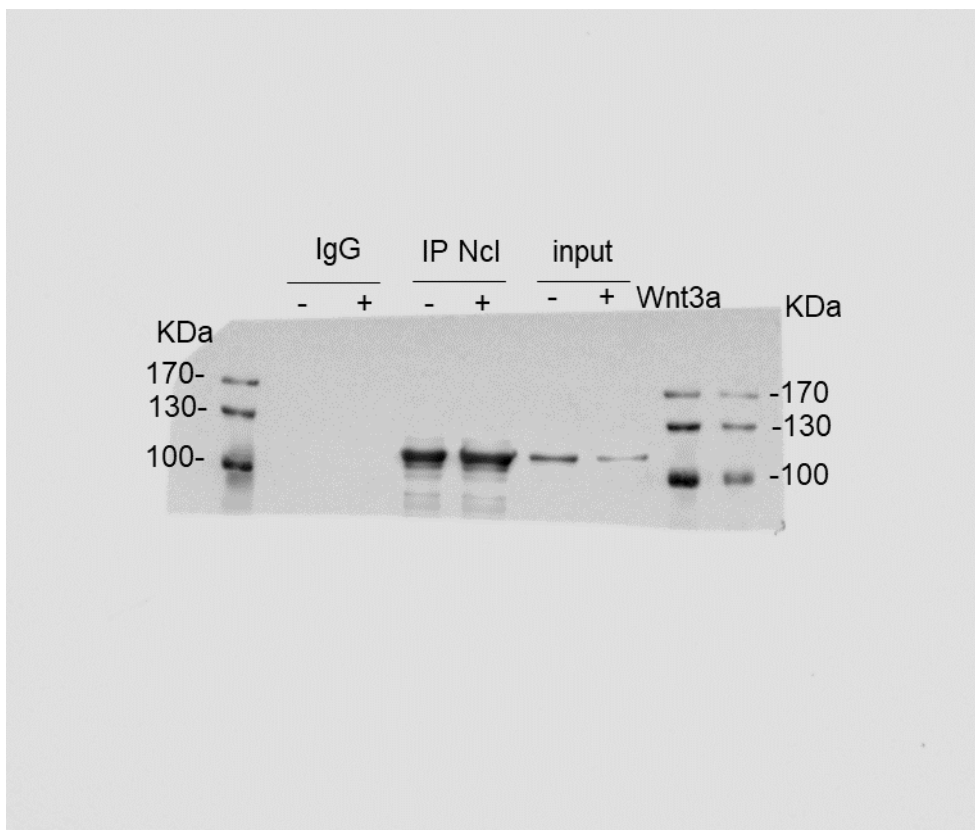

Figure 3B MIA PaCa-2 – siNCL+Wnt3A – anti-active  $\beta$ -catenin

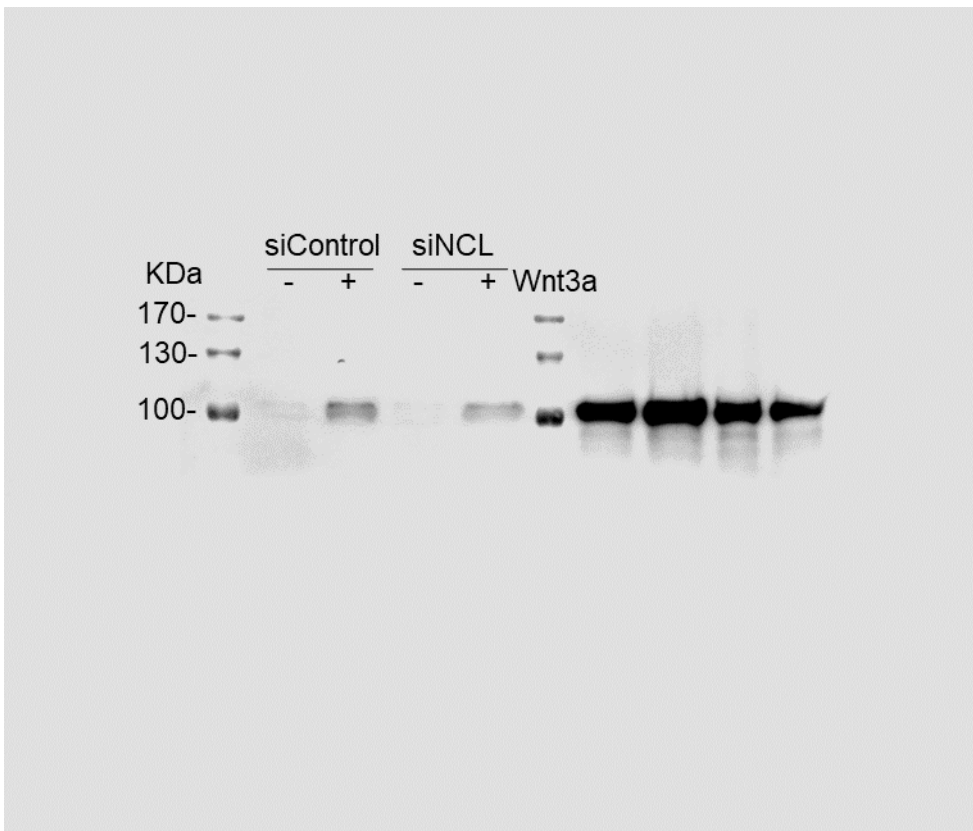

Figure 3B MIA PaCa-2 – siNCL+Wnt3A – anti-nucleolin

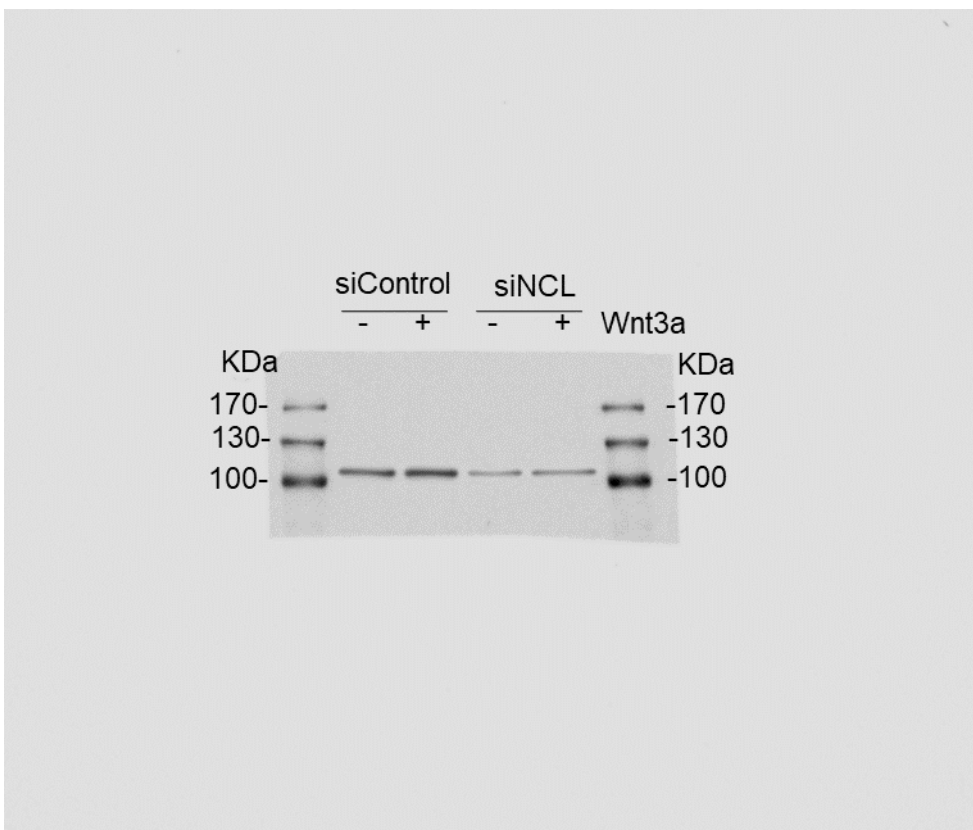



Western blot analysis of Wnt3a protein levels. The blot shows bands for Wnt3a at approximately 40 kDa. Lanes are labeled: siControl (-), siControl (+), siNCL (-), siNCL (+), and Wnt3a. Molecular weight markers are indicated on the left (55, 40, 35 kDa) and right (55, 40, 35 kDa). The Wnt3a lane shows a strong band at 40 kDa. The siControl and siNCL lanes show bands at 40 kDa, with the siNCL (+) lane showing a slightly reduced intensity compared to siControl (+).

Western blot analysis of NCL protein levels. The blot shows bands for NCL at approximately 170, 130, 100, 55, and 40 kDa. The lanes are labeled: control (e, NCL), Wnt3a (e, NCL), control (e, NCL), and Wnt3a (e, NCL). Molecular weight markers (KDa) are indicated on both sides of the blot.

Figure 3D MIA PaCa-2 – NCL-GFP +Wnt3A – anti-active  $\beta$ -catenin and anti-nucleolin

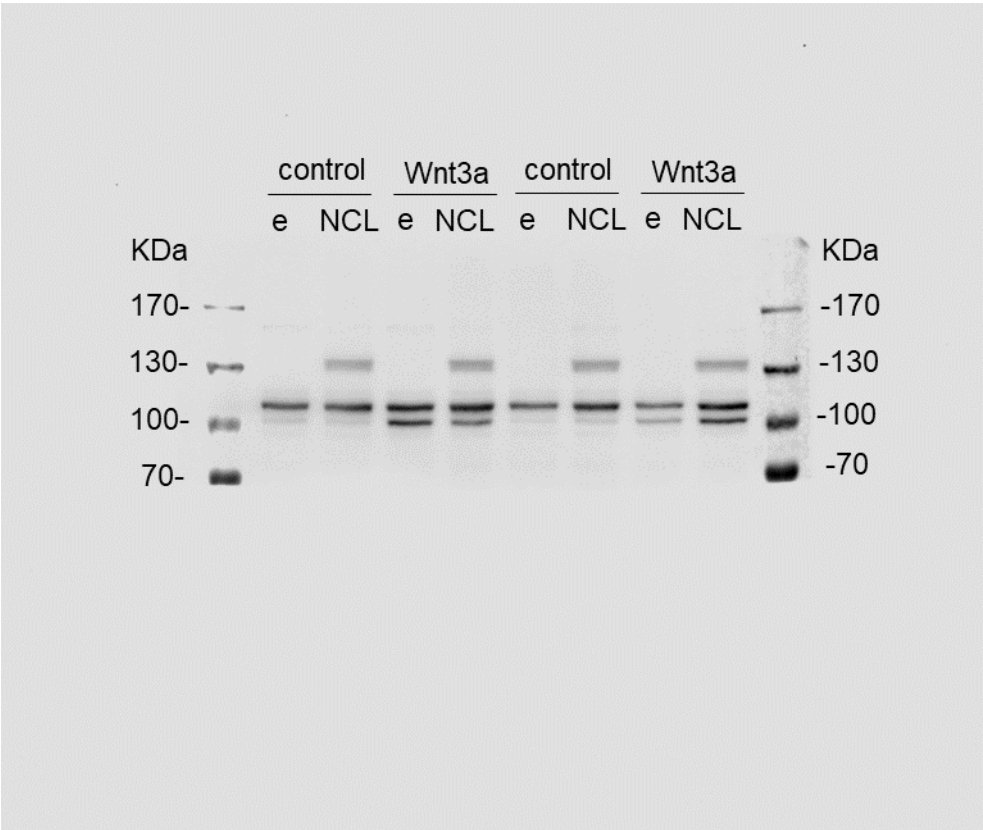

Figure 3D MIA PaCa-2 – NCL-GFP +Wnt3A – anti- $\beta$ -actin

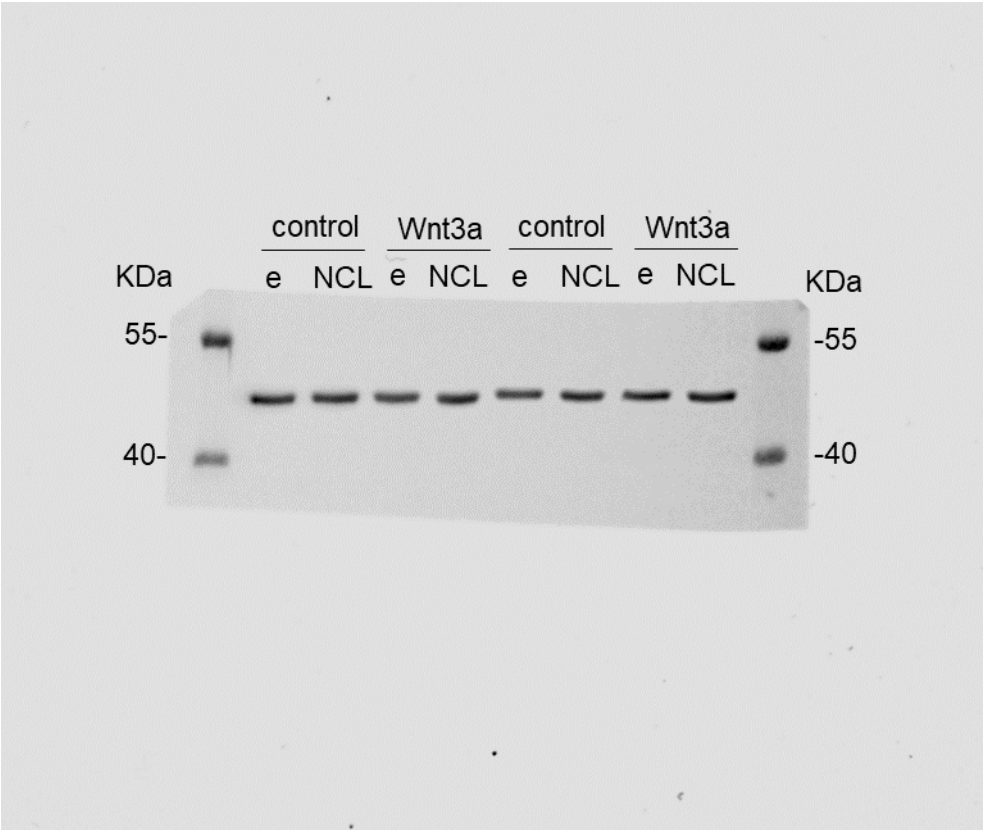

Supplement: s1 [file s1]
