# Supplementary material for: Nucleolin Targeting by N6L Inhibits Wnt/β-Catenin Pathway Activation in Pancreatic Ductal Adenocarcinoma
Source: MDPI journal article supplement (doi:10.3390/cancers13122986), 2021-06-15
Supplement: s1 [file s1]

# Nucleolin Targeting by N6L Inhibits Wnt/ $\beta$ -Catenin Pathway Activation in Pancreatic Ductal Adenocarcinoma

Fabio Raineri, Sandrine Bourgoïn-Voillard, Méli ssande Cossutta, Damien Habert, Matteo Ponz o <sup>1</sup>, Claire Houpe, Benoît Vallée, Michele Boni otto, Mounira Chalabi-Dchar, Philippe Bouvet, Anne Couvelard, Jerome Cros, Anais Debesset, José L. Cohen, José Courty and Ilaria Cascone

## 1.1 Antibodies

For Western Blotting analysis, the following primary antibodies were used: anti-nucleolin (Abcam ab22758, 1:1000), anti- $\beta$ -catenin (Sigma C2206, 1:1000), anti-non-phospho (active)  $\beta$ -catenin (Cell Signaling #8814, 1:1000), anti-GFP (Santa Cruz sc-9996, 1:200), anti-Cyclin D1 (Cell signaling #2978, 1:1000), anti-phospho-Ser9-GSK3 $\beta$  (XX, 1:500) and anti- $\beta$ -actin HRP (Sigma A-5441, 1:10000). Anti-rabbit IgG HRP (Jackson 111-035-144, 1:10000) and anti-mouse IgG HRP antibodies (Jackson 705-065-147, 1:10000) were used as secondary antibodies. For immunofluorescence, the following primary antibodies were used: anti-non-phospho (active)  $\beta$ -catenin (Cell Signaling #8814, 1:800) and anti-Cyclin D1 (Cell signaling #2978, 1:800). Anti-rabbit IgG Alexa Fluor 488 antibody (Thermo Scientific A-21206, 1:400) was used as secondary antibody.

## 1.2. Pull-down with biotinylated-N6L

Synthesis of N6L is carried out as previously described (Destouches et al., 2011). Biotinylated-N6L was prepared by inducing a disulfide bond between biotin and Cys-N6L (Destouches et al., 2011). Increasing concentrations of biotinylated-N6L were incubated on mPDAC and MIA PaCa-2 cells at room temperature for 45 minutes. A subcellular extra-nuclear lysis was performed as described in (Callebaut et al., 1996) to harvest membrane and cytoplasmic proteins while excluding nuclear proteins. The affinity-purification assay based on streptavidin sepharose beads (GE Healthcare, Life Sciences, 17-5113-01) and biotinylated-N6L was performed on 1 mg of protein extract. Biotin alone was used as negative control. Protein complexes were eluted, separated by 8% SDS-PAGE and colored by Commassie blue.

## 1.3. Proteomic analysis

Each band of the SDS-PAGE of biotinylated-N6L pull-down was submitted to in-gel digestion by using Trypsin 3% (Sigma) after performing a reduction of disulfide bonds with DTT and cysteine alkylation with iodoacetamide. Resulting peptides were extracted and analyzed on a nanoLC-C18/MS system, a nanoAcquity UPLC (Waters) coupled to a SYNAPT G2-Si High Definition Mass Spectrometer (Waters) equipped with a nano-electrospray ionization source operating in a positive mode. In the nanoAcquity UPLC system, samples were desalted through a C18 trapping column (NanoACQUITY Symmetry C18, 20mm, 180 $\mu$ m, 100Å, 5 $\mu$ m, Waters) before separating peptides according to their hydrophobicity on a C18 reverse phase nano-column (nanoACQUITY peptide BEH C18, 100 mm, 100 $\mu$ m, 130Å, 1.7 $\mu$ m, 100 $\mu$ m, Waters). The SYNAPT G2-Si High Definition mass spectrometer was operated in MSE mode, a mode in which the MSE technology uses the high-efficiency T-Wave ion mobility cell to fractionate ions according to their charge states/shapes, and improve sensitivity and

specificity of the analysis. Identification of peptides and resulting proteins was performed by analyzing MS and MSE data with PLGS software (Protein Lynx Global Server, version 3.1, Waters) and the UniprotKB/Swissprot database (Release-2019\_02) and by considering: carboamidomethylation as a fixed modification, oxidation of methionine as a variable modification, 1 missed cleavage allowed, lock mass for charge 3 of ionized leucine enkephalin ( $m/z$  556.2771  $\pm$  0.25 u), mass precursor tolerance: automatic and fragment ion tolerance: automatic. Only proteins matching with the following criteria were retained as identified: a PLGS confident score equal to 2, a minimum of 2 unique peptides (Supplementary Table 1) for a FDR (False Discovery Rate) of 4%. Non-specific proteins found in the negative control (biotinylated control) were subtracted from the list of the specific proteins interacting with N6L. This complete analysis was performed in duplicates. Proteins exclusively identified in N6L pull-down samples for both duplicates were retained as N6L partners. A network of these N6L protein partners in PDAC (N6L interactome in Supplementary Figure 2) was built by using Cytoscape software (version 3.8.0) (Shannon et al., 2003) with StringApp v1.5.1 and STRING database (Doncheva et al., 2019). Gene ontology of this network was obtained by using Cytoscape software with ClueGO (version 2.5.6) / CluePedia (version 1.5.6) applications (Bindea et al., 2013, 2009). WikiPathway (Kutmon et al., 2016) was used to build the Wnt pathway into Cytoscape and to establish the connection of Wnt pathway with N6L network.

#### *1.4. TMA staining and analysis*

An immunohistochemical staining was performed with anti-active  $\beta$ -catenin antibody using standard protocol in 45 human PDAC included in a tissue microarray (TMA) paraffin block. Immunostaining, was performed using an automatized technique (Streptavidin-peroxydase with an automate Bond Max, Leica), and slides were counterstained with hematoxylin. Images were taken by the by Scanner Aperio Scanscope CS. Analysis of active  $\beta$ -catenin staining was performed by a score determination corresponding to the intensity of the labeling of tumor cells from 0 to 3 (0, no staining; 1, low staining; 2, moderate staining; 3, high staining) in each spot. The final score for each tumor was the average of the scores obtained for each spot available by tumor.

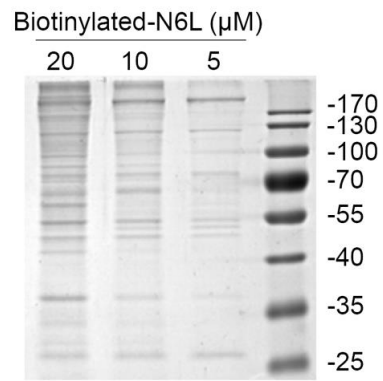

**Supplementary Figure S1.**

Colloidal Blue gel showing the protein bands from 5, 10 and 20  $\mu\text{M}$  biotinylated-N6L pull-down. The protein band intensity increased by increasing the biotinylated-N6L concentration.

**Figure S1:** Biotinylated-N6L pull-down.

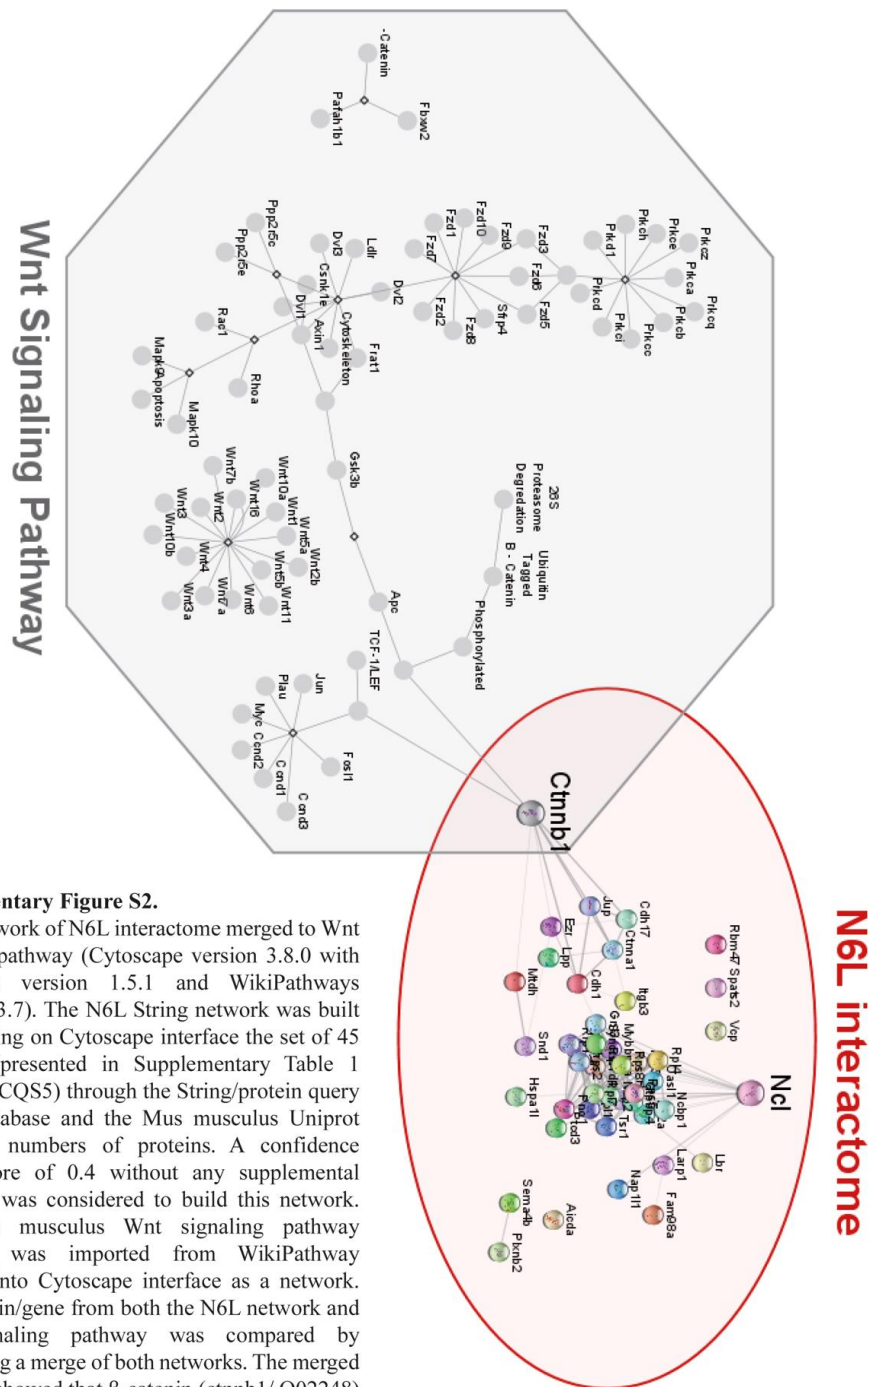

**Supplementary Figure S2.** String network of N6L interactome merged to Wnt signaling pathway (Cytoscape version 3.8.0 with StringApp version 1.5.1 and WikiPathways version 3.3.7). The N6L String network was built by importing on Cytoscape interface the set of 45 proteins (presented in Supplementary Table 1 except Q9CQS5) through the String/protein query public database and the Mus musculus Uniprot accession numbers of proteins. A confidence cutoff score of 0.4 without any supplemental interactor was considered to build this network. The Mus musculus Wnt signaling pathway (WP403) was imported from WikiPathway database into Cytoscape interface as a network. This protein/gene from both the N6L network and Wnt signaling pathway was compared by considering a merge of both networks. The merged networks showed that  $\beta$ -catenin (ctnnb1/ Q02248) interplays in both N6L and Wnt signaling pathway networks.

**Figure S2:** N6L interactome.

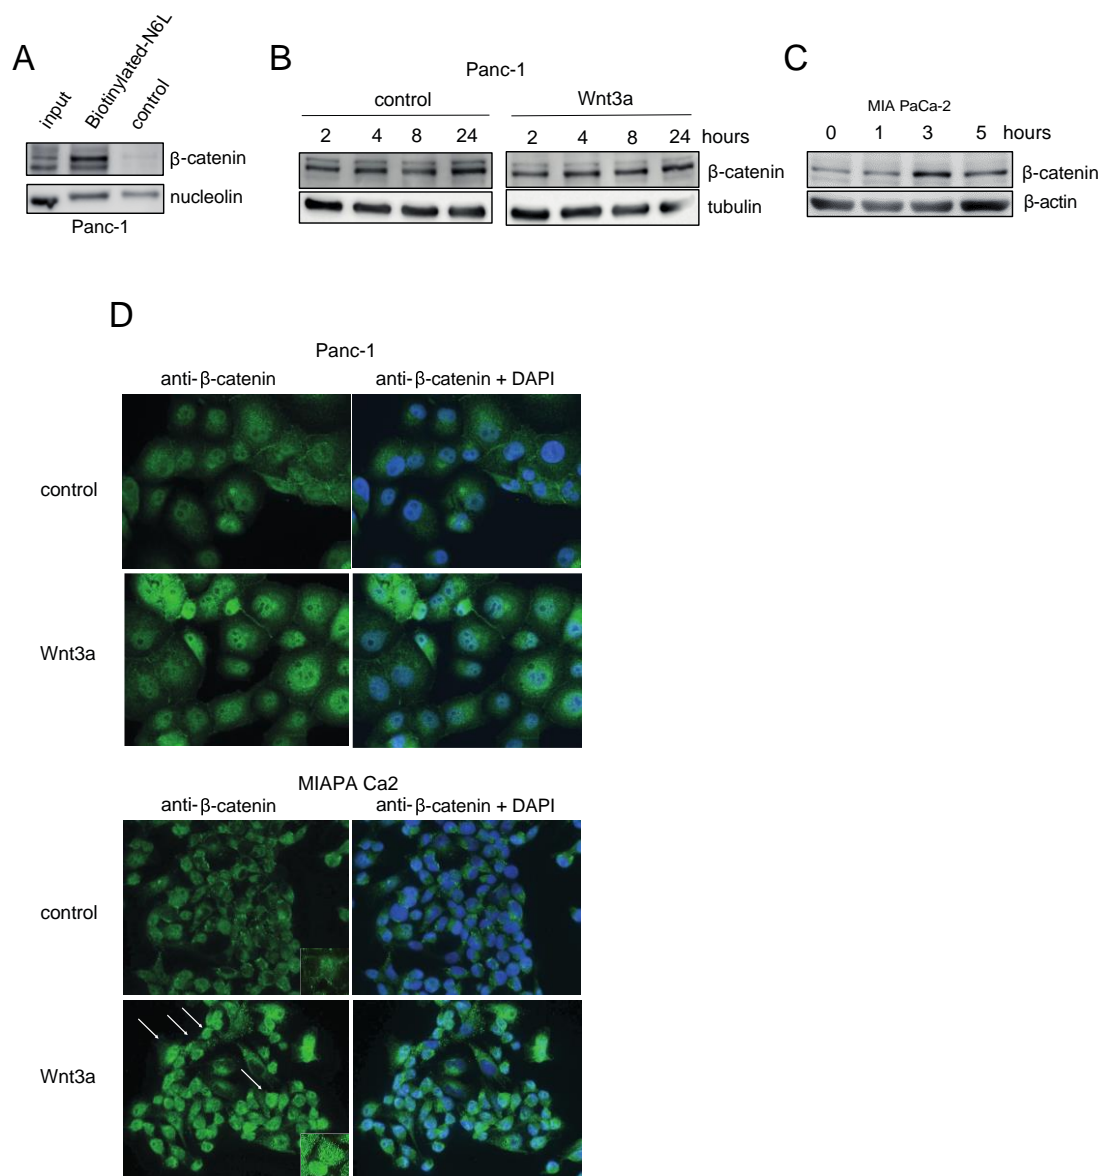

**Supplementary Figure S3. MIA PaCa-2 and Panc-1 cell comparison.**

(A) The cell lysate of the extranuclear cellular fraction (input) and the biotinylated N6L pull-down of Panc-1 cells were analyzed by Western Blotting with anti-nucleolin and b-catenin antibodies. (B and C) Western Blotting of active and total b-catenin of MIA PaCa-2 and Panc-1 cells stimulated by Wnt3a-CM at the indicated different time points. (D) Immunofluorescence staining of b-catenin in Panc-1 (upper) and MIA PaCa-2 (down) cells stimulated or not by Wnt3A by using an anti-b-catenin antibody. Nuclei were stained by DAPI. In MIA PaCa-2 cells, b-catenin localizes to the nuclei after stimulation with Wnt3A (arrows) while in Panc-1 cells, b-catenin was already present in the nuclei of unstimulated cells

**Figure S3. MIA PaCa-2 and Panc-1 cell comparison.**

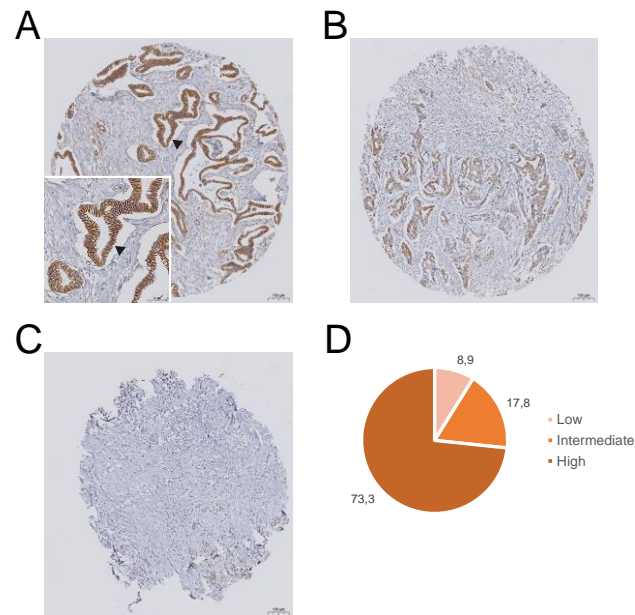

**Supplementary Figure S4.**

Human PDAC included in a TMA was immunostained with an anti-non-phosphorylated  $\beta$ -catenin antibody and scored as high (A), intermediate (B), low (C) or negative (see Materials and Methods). Active  $\beta$ -catenin was highly expressed by tumoral ducts (arrowhead in A).

**Figure S4.** Active  $\beta$ -catenin staining in PDAC patients.

**Table S1:** Mass-spectrometry analysis of N6L pull-down proteins.

| Uniprot<br>Accession<br>Number | Entry       | Protein name                                                       | PLGS<br>Score | Peptides | Coverage (%) | nucleolin interaction     |
|--------------------------------|-------------|--------------------------------------------------------------------|---------------|----------|--------------|---------------------------|
| P09405                         | NUCL_MOUSE  | Nucleolin                                                          | 4870          | 60       | 46           |                           |
| O54890                         | ITB3_MOUSE  | Integrin beta-3                                                    | 573           | 18       | 26           | (Koutsoumpa et al., 2013) |
| P12970                         | RL7A_MOUSE  | 60S ribosomal protein L7A                                          | 11638         | 38       | 64           | (Salveti et al., 2016)    |
| P14148                         | RL7_MOUSE   | 60S ribosomal protein L7                                           | 16104         | 52       | 59           | (Salveti et al., 2016)    |
| P35980                         | RL18_MOUSE  | 60S ribosomal protein L18                                          | 7796          | 15       | 39           | (Salveti et al., 2016)    |
| P47962                         | RL5_MOUSE   | 60S ribosomal protein L5                                           | 11788         | 32       | 48           | (Salveti et al., 2016)    |
| P62242                         | RS8_MOUSE   | 40S ribosomal protein S8                                           | 15051         | 27       | 64           | (Salveti et al., 2016)    |
| P97461                         | RS5_MOUSE   | 40S ribosomal protein S5                                           | 6322          | 15       | 40           | (Salveti et al., 2016)    |
| Q14C51                         | PTCD3_MOUSE | Pentatricopeptide repeat domain-containing protein 3_mitochondrial | 471           | 29       | 29           | (Salveti et al., 2016)    |
| Q6ZQ58                         | LARP1_MOUSE | La-related protein 1                                               | 1742          | 47       | 38           | (Burrows et al., 2010)    |
| Q78PY7                         | SND1_MOUSE  | Staphylococcal nuclease domain-containing protein 1                | 3679          | 60       | 40           | (Cappellari et al., 2013) |
| Q7TMK9                         | HNRPO_MOUSE | Heterogeneous nuclear ribonucleoprotein Q                          | 1941          | 35       | 32           | (Peddigari et al., 2013)  |
| Q7TPV4                         | MBB1A_MOUSE | Myb-binding protein 1A                                             | 745           | 32       | 24           | (Mori et al., 2012)       |
| Q8BYV0                         | RLID1_MOUSE | Ribosomal L1 domain-containing protein 1                           | 424           | 13       | 24           | (Salveti et al., 2016)    |
| Q8C111                         | GNL3_MOUSE  | Guanine nucleotide-binding protein-like 3                          | 417           | 14       | 31           | (Salveti et al., 2016)    |
| Q8VEK3                         | HNRPU_MOUSE | Heterogeneous nuclear ribonucleoprotein U                          | 865           | 24       | 25           | (Salveti et al., 2016)    |
| Q922K7                         | NOP2_MOUSE  | Probable 28S rRNA (cytosine-C(5))-methyltransferase                | 177           | 15       | 24           | (Salveti et al., 2016)    |
| Q99ME9                         | NOG1_MOUSE  | Nucleolar GTP-binding protein 1                                    | 1218          | 18       | 25           | (Salveti et al., 2016)    |
| Q9D8E6                         | RL4_MOUSE   | 60S ribosomal protein L4                                           | 7539          | 52       | 47           | (Shen et al., 2016)       |
| B2RXS4                         | PLXB2_MOUSE | Plexin-B2                                                          | 2607          | 88       | 36           |                           |
| P09803                         | CADH1_MOUSE | Cadherin-1                                                         | 2874          | 50       | 23           |                           |
| P16627                         | HS71L_MOUSE | Heat shock 70 kDa protein 1-like                                   | 2034          | 19       | 33           |                           |
| P26040                         | EZRI_MOUSE  | Ezrin                                                              | 230           | 22       | 32           |                           |
| P26231                         | CTNA1_MOUSE | Catenin alpha-1                                                    | 18797         | 115      | 62           |                           |

|        |             |                                                  |      |    |    |  |
|--------|-------------|--------------------------------------------------|------|----|----|--|
| P28656 | NP1L1_MOUSE | Nucleosome assembly protein 1-like 1             | 7106 | 17 | 26 |  |
| Q01853 | TERA_MOUSE  | Transitional endoplasmic reticulum ATPase        | 1060 | 31 | 37 |  |
| Q02248 | CTNB1_MOUSE | Catenin beta-1                                   | 6898 | 59 | 39 |  |
| Q02257 | PLAK_MOUSE  | Junction plakoglobin                             | 5642 | 51 | 57 |  |
| Q3TJZ6 | FA98A_MOUSE | Protein FAM98A                                   | 332  | 13 | 32 |  |
| Q3U9G9 | LBR_MOUSE   | Lamin-B receptor                                 | 494  | 14 | 16 |  |
| Q3UYV9 | NCBP1_MOUSE | Nuclear cap-binding protein subunit 1            | 821  | 14 | 15 |  |
| Q5SWD9 | TSR1_MOUSE  | Pre-rRNA-processing protein TSR1 homolog         | 1665 | 36 | 26 |  |
| Q62179 | SEM4B_MOUSE | Semaphorin-4B                                    | 744  | 18 | 21 |  |
| Q6P5B0 | RRP12_MOUSE | RRP12-like protein                               | 1002 | 46 | 30 |  |
| Q80WJ7 | LYRIC_MOUSE | Protein LYRIC                                    | 1834 | 23 | 35 |  |
| Q8BFW7 | LPP_MOUSE   | Lipoma-preferred partner homolog                 | 266  | 12 | 28 |  |
| Q8BJW6 | EIF2A_MOUSE | Eukaryotic translation initiation factor 2A      | 1751 | 26 | 43 |  |
| Q8K1N4 | SPAS2_MOUSE | Spermatogenesis-associated serine-rich protein 2 | 325  | 15 | 37 |  |
| Q8V194 | OASL1_MOUSE | 2'-5'-oligoadenylate synthase-like protein 1     | 2463 | 20 | 44 |  |
| Q91WT8 | RBM47_MOUSE | RNA-binding protein 47                           | 317  | 14 | 24 |  |
| Q924T2 | RT02_MOUSE  | 28S ribosomal protein S2, mitochondrial          | 243  | 3  | 13 |  |
| Q9CPS7 | PNO1_MOUSE  | RNA-binding protein PNO1                         | 2006 | 11 | 42 |  |
| Q9CQS5 | RIOK2_MOUSE | Serine/threonine-protein kinase RIO2             | 433  | 15 | 22 |  |
| Q9R100 | CAD17_MOUSE | Cadherin-17                                      | 830  | 16 | 24 |  |
| Q9WVE0 | AICDA_MOUSE | Single-stranded DNA cyt                          | 190  | 7  | 29 |  |

**Supplementary Table 1. Proteins identified by mass-spectrometry from N6L pull-down in mPDAC cells.**  
Group of 45 proteins found by performing the biotinylated-N6L pull-down of mPDAC cells. 18 proteins are referenced to interact with nucleolin.



**Table S2:** Gene ontology (GO) analysis of N6L pull-down proteins.

| GOID       | GO Term                                       | Ontology Source                                       | Term P Value |
|------------|-----------------------------------------------|-------------------------------------------------------|--------------|
| GO:0006441 | regulation of translational initiation        | GO_BiologicalProcess:EBI-UniProt-GOA_10_12_2019_00h00 | 3.98E-04     |
| GO:004225  | ribosome assembly                             | GO_BiologicalProcess:EBI-UniProt-GOA_10_12_2019_00h00 | 1.13E-05     |
| GO:004227  | ribosomal small subunit biogenesis            | GO_BiologicalProcess:EBI-UniProt-GOA_10_12_2019_00h00 | 1.50E-05     |
| GO:003049  | maturation of SSU-RNA                         | GO_BiologicalProcess:EBI-UniProt-GOA_10_12_2019_00h00 | 1.44E-04     |
| GO:190236  | negative regulation of RNA catabolic process  | GO_BiologicalProcess:EBI-UniProt-GOA_10_12_2019_00h00 | 4.33E-04     |
| GO:004348  | RNA stabilization                             | GO_BiologicalProcess:EBI-UniProt-GOA_10_12_2019_00h00 | 2.51E-04     |
| GO:190237  | negative regulation of mRNA catabolic process | GO_BiologicalProcess:EBI-UniProt-GOA_10_12_2019_00h00 | 2.51E-04     |
| GO:004825  | mRNA stabilization                            | GO_BiologicalProcess:EBI-UniProt-GOA_10_12_2019_00h00 | 1.53E-04     |
| GO:004225  | ribosome biogenesis                           | GO_BiologicalProcess:EBI-UniProt-GOA_10_12_2019_00h00 | 3.35E-14     |
| GO:004227  | ribosomal large subunit biogenesis            | GO_BiologicalProcess:EBI-UniProt-GOA_10_12_2019_00h00 | 6.15E-07     |
| GO:000636  | RNA processing                                | GO_BiologicalProcess:EBI-UniProt-GOA_10_12_2019_00h00 | 5.04E-10     |
| GO:000047  | maturation of LSU-RNA                         | GO_BiologicalProcess:EBI-UniProt-GOA_10_12_2019_00h00 | 8.09E-07     |
| GO:001607  | RNA metabolic process                         | GO_BiologicalProcess:EBI-UniProt-GOA_10_12_2019_00h00 | 7.24E-10     |
| GO:009732  | response to antineoplastic agent              | GO_BiologicalProcess:EBI-UniProt-GOA_10_12_2019_00h00 | 7.51E-09     |
| GO:000704  | cell-cell junction assembly                   | GO_BiologicalProcess:EBI-UniProt-GOA_10_12_2019_00h00 | 5.51E-06     |
| GO:007169  | response to indole-3-methanol                 | GO_BiologicalProcess:EBI-UniProt-GOA_10_12_2019_00h00 | 5.64E-10     |
| GO:009730  | cellular response to alcohol                  | GO_BiologicalProcess:EBI-UniProt-GOA_10_12_2019_00h00 | 2.19E-06     |
| GO:007168  | cellular response to indole-3-methanol        | GO_BiologicalProcess:EBI-UniProt-GOA_10_12_2019_00h00 | 2.42E-10     |
| GO:004329  | apical junction assembly                      | GO_BiologicalProcess:EBI-UniProt-GOA_10_12_2019_00h00 | 3.19E-04     |

**Supplementary Table 2. Biological Process GO terms of biotinylated-N6L pull-down proteins.**

## References

1. Bindea, G., Galon, J., Mlecnik, B., 2013. CluePedia Cytoscape plugin: pathway insights using integrated experimental and in silico data. *Bioinformatics* 29, 661–663. <https://doi.org/10.1093/bioinformatics/btt019>
2. Bindea, G., Mlecnik, B., Hackl, H., Charoentong, P., Tosolini, M., Kirilovsky, A., Fridman, W.-H., Pagès, F., Trajanoski, Z., Galon, J., 2009. ClueGO: a Cytoscape plug-in to decipher functionally grouped gene ontology and pathway annotation networks. *Bioinformatics* 25, 1091–1093. <https://doi.org/10.1093/bioinformatics/btp101>
3. Callebaut, C., Jacotot, E., Guichard, G., Krust, B., Rey-Cuille, M.-A., Cointe, D., Benkirane, N., Blanco, J., Muller, S., Briand, J.-P., Hovanessian, A.G., 1996. Inhibition of HIV Infection by Pseudopeptides Blocking

Viral Envelope Glycoprotein-Mediated Membrane Fusion and Cell Death. *Virology* 218, 181–192. <https://doi.org/10.1006/viro.1996.0178>

4. Destouches, D., Page, N., Hamma-Kourbali, Y., Machi, V., Chaloin, O., Frechault, S., Birmpas, C., Katsoris, P., Beyrath, J., Albanese, P., Maurer, M., Carpentier, G., Strub, J.-M., Dorsselaer, A.V., Muller, S., Bagnard, D., Briand, J.P., Courty, J., 2011. A Simple Approach to Cancer Therapy Afforded by Multivalent Pseudopeptides That Target Cell-Surface Nucleoproteins. *Cancer Res* 71, 3296–3305. <https://doi.org/10.1158/0008-5472.CAN-10-3459>
5. Doncheva, N.T., Morris, J.H., Gorodkin, J., Jensen, L.J., 2019. Cytoscape StringApp: Network Analysis and Visualization of Proteomics Data. *J. Proteome Res.* 18, 623–632. <https://doi.org/10.1021/acs.jproteome.8b00702>
6. Kutmon, M., Riutta, A., Nunes, N., Hanspers, K., Willighagen, E.L., Bohler, A., Mélius, J., Waagmeester, A., Sinha, S.R., Miller, R., Coort, S.L., Cirillo, E., Smeets, B., Evelo, C.T., Pico, A.R., 2016. WikiPathways: capturing the full diversity of pathway knowledge. *Nucleic Acids Res.* 44, D488–494. <https://doi.org/10.1093/nar/gkv1024>
7. Shannon, P., Markiel, A., Ozier, O., Baliga, N.S., Wang, J.T., Ramage, D., Amin, N., Schwikowski, B., Ideker, T., 2003. Cytoscape: a software environment for integrated models of biomolecular interaction networks. *Genome Res.* 13, 2498–2504. <https://doi.org/10.1101/gr.1239303>
